# Supplementary material for: Bimetallic sulfide particles incorporated in Fe/Co-based metal–organic framework ultrathin nanosheets toward boosted electrocatalysis of the oxygen evolution reaction
Source: Royal Society of Chemistry journal article supplement (doi:10.1039/d2qi00125j), 2022-01-01
Supplement: d2qi00125j1.pdf [file d2qi00125j1.pdf]

**Supporting Information for**  
**Bimetallic sulfide particles incorporated in Fe/Co-based metal-**  
**organic framework ultrathin nanosheets toward boosted**  
**electrocatalysis of the oxygen evolution reaction**

Rui Yu,<sup>a</sup> Cheng Wang,<sup>a</sup> Dongmei Liu,<sup>a</sup> Zhengying Wu,<sup>\*b</sup> Jie Li<sup>a</sup> and Yukou Du<sup>\*a</sup>

<sup>a</sup> *College of Chemistry, Chemical Engineering and Materials Science, Soochow*

*University, Suzhou 215123, PR China*

<sup>b</sup> *Jiangsu Key Laboratory for Environment Functional Materials, School of Chemical*

*Biology and Materials Engineering, Suzhou University of Science and Technology,*

*Suzhou 215009, PR China*

<sup>\*</sup> *Corresponding author: Tel: 86-512-65880967, Fax: 86-512-65880089;*

*E-mail: zywu@mail.usts.edu.cn (Z. Wu); duyk@suda.edu.cn (Y. Du)*

## **1. Experimental Section**

### **1.1 Chemical reagents**

N, N-dimethylformamide (DMF, reagent, 99.5%) was bought from Aladdin. Co(NO<sub>3</sub>)<sub>2</sub>·6H<sub>2</sub>O (99.99%) was purchased from Shanghai Macklin Biochemical. KOH (analytical reagent), Ni(NO<sub>3</sub>)<sub>2</sub>·6H<sub>2</sub>O (≧98.5%), Cu(NO<sub>3</sub>)<sub>2</sub>·3H<sub>2</sub>O, Fe(NO<sub>3</sub>)<sub>3</sub>·9H<sub>2</sub>O (≧98.6%), Terephthalic acid (TPA, 99%), isopropanol (C<sub>3</sub>H<sub>8</sub>O, >99.7%) and ethanol (C<sub>2</sub>H<sub>5</sub>OH) were bought from Sinopharm Chemical Reagent Co., Ltd. (Shanghai, China). Thioacetamide (TAA, 99%) was bought from J&K Scientific Ltd., AEF. Nafion (5 wt%) was bought from Sigma-Alirich. All reagents were directly employed without extra additional handling.

## 1.2 Synthesis of CoM(M=Fe, Ni, Cu)-MS/MOF, CoFe-MOF and (Fe)-Co<sub>3</sub>S<sub>4</sub>

In the preparation of CoFe-MS/MOF, TPA (66.5 mg), Co(NO<sub>3</sub>)<sub>2</sub>·6H<sub>2</sub>O (111.65 mg), Fe(NO<sub>3</sub>)<sub>3</sub>·9H<sub>2</sub>O (38.784 mg), and TAA (50 mg) were dispersed in 10 mL of DMF and 4 mL ethanol, subsequently stirred for 20 min to yield a homogeneous solution. The solution was transferred to a Teflon autoclave to heat at 150 °C for five hours. The resultant substances were rinsed with distilled water, centrifuged, and subsequently dried in an oven at 60 °C to yield CoFe-MS/MOF. For comparison, other CoFe-MS/MOF electrocatalysts with different Fe/Co ratios were synthesized as well. The synthesis procedures for CoNi-MS/MOF and CoCu-MS/MOF were similar to those for CoFe-MS/MOF except changing Fe(NO<sub>3</sub>)<sub>3</sub>·9H<sub>2</sub>O to Ni(NO<sub>3</sub>)<sub>2</sub>·6H<sub>2</sub>O and Cu(NO<sub>3</sub>)<sub>2</sub>·3H<sub>2</sub>O, respectively. CoFe-MOF and (Fe)-Co<sub>3</sub>S<sub>4</sub> were synthesized using the similar procedures as that of CoFe-MS/MOF in the absence of TAA and TPA, respectively.

## 1.3 Fabrication of Pt/C and RuO<sub>2</sub> Electrodes

1 mg of Pt/C (20wt%) or 6 mg RuO<sub>2</sub> powder ( $\geq 75.2\%$ ) was dispersed in the mixture of isopropanol (1.0 mL) and Nafion solution (5 wt%, 25  $\mu$ L), respectively. After ultrasonic treatment for 30 min to obtain a homogeneous ink, 20  $\mu$ L of ink was dropped on the glassy carbon electrode and dried at 60 °C. At this point, Pt/C and RuO<sub>2</sub> electrodes were successfully fabricated.

## 1.4 Material Characterizations

The phase composition and purity of the samples were analyzed by powder X-ray diffraction (XRD) with Cu K $\alpha$  radiation ( $\lambda = 1.54 \text{ \AA}$ ). Scanning electron microscopy (SEM) was operated at 15 kV. Further morphological characterizations of samples were conducted by transmission electron microscope (TEM) operated at 120 kV and

high-resolution TEM (HRTEM) using a TecnaiG2F20 TEM operated at 200 kV. X-ray photoelectron spectroscopy (XPS) measurement was conducted by Thermo Scientific's EXCALAB 250 XI system. Raman spectra were recorded under ambient conditions by XploRA Plus micro-Raman spectrometer from Horiba Jobin Yvon.

### **1.5 Electrochemical characterization**

All electrochemical tests were conducted on CHI660 workstation (Chenhua, Shanghai) by employing the three-electrode system, in which the glassy carbon (GC), Ag/AgCl and carbon rod served as the working electrode, reference electrode and counter electrode in 1 M KOH, separately. To fabricated working electrodes, 4 mg catalysts and 2mg toners were dispersed in hybrid solution containing 1.0 mL of isopropanol and 30  $\mu$ L Nafion. After 30-minute ultrasound, the appropriate amount of catalyst ink was dripped onto the GC electrodes (diameter: 5 mm, area: 0.196 cm<sup>2</sup>). Polarization curves were obtained by linear sweep voltammetry (LSV) measurements at a scan rate of 5 mV s<sup>-1</sup> without iR compensation. The Tafel slopes were derived from polarization curves. CV test is performed at sweep rates ranging from 10 to 50 mV/s. Electrochemical impedance spectroscopy (EIS) was conducted in the frequency region from 1 Hz to 500 kHz. Chronopotentiometry measurement was conducted at the current density of 10 mA cm<sup>-2</sup>. The i-t curve was tested at a potential of 1.5 V (vs. RHE). Electrochemical water splitting was measured by employing a dual-electrode system.

## 2. Supporting Figures and Tables

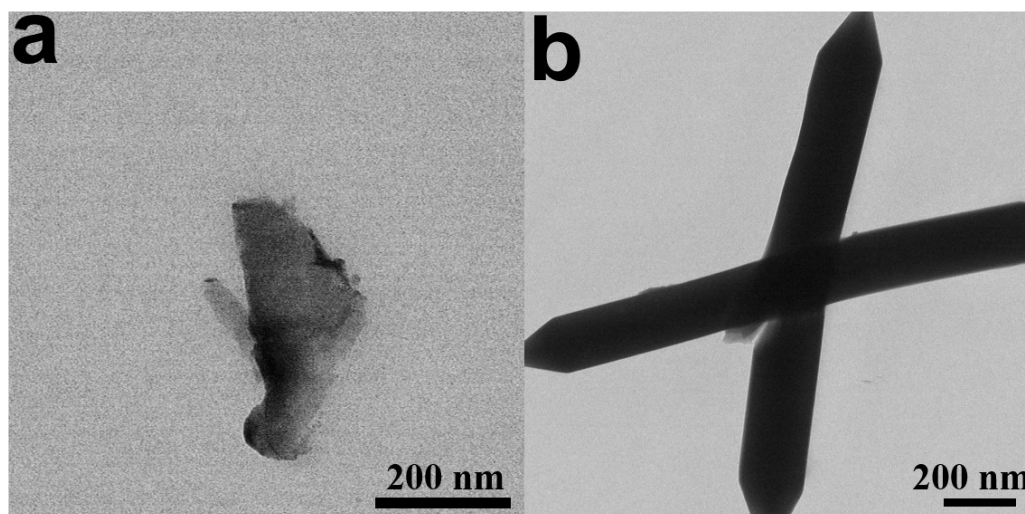

**Fig.S1** TEM images of (a) CoNi-MS/MOF, (b) CoCu-MS/MOF.

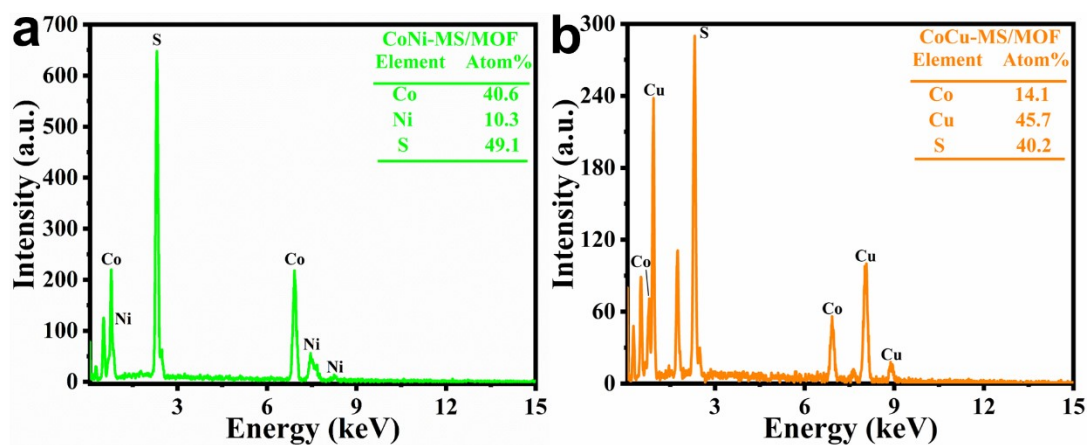

**Fig.S2** EDX spectrum and atomic percentages of (a) CoNi-MS/MOF and (b) CoCu-MS/MOF.

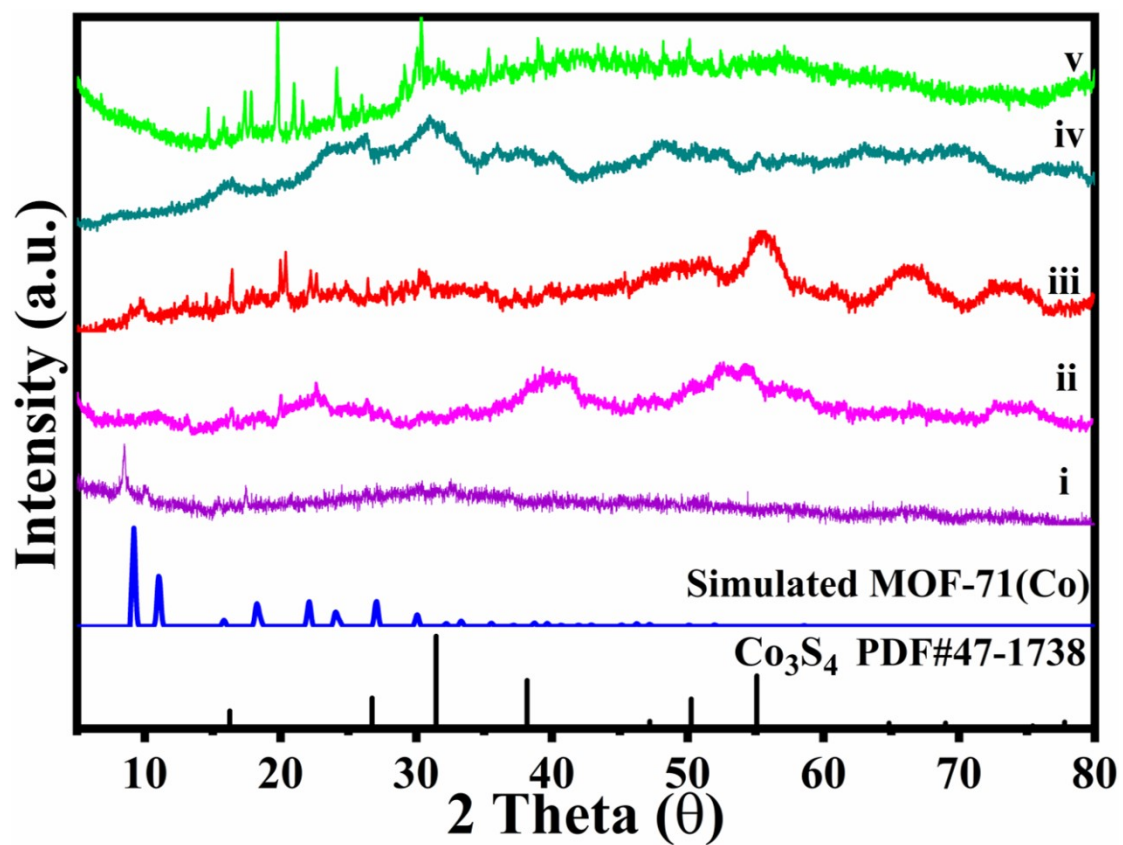

**Fig.S3** XRD patterns of (i) CoFe-MOF, (ii) (Fe)-Co<sub>3</sub>S<sub>4</sub> and different CoFe-MS/MOF samples synthesized with different mount of TAA (iii) 0.05 g, (iv) 0.08 g, and (v) 0.11 g.

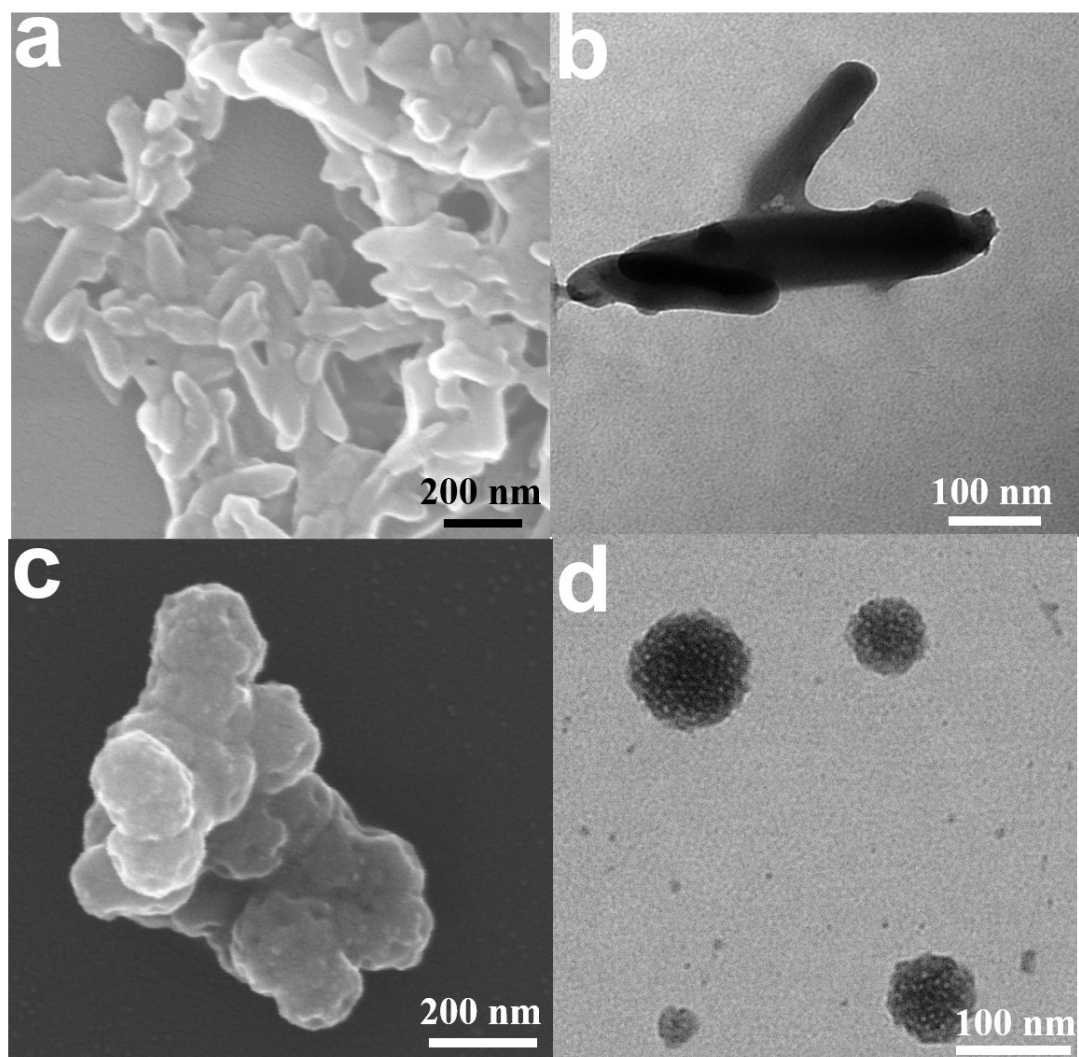

**Fig.S4** (a) SEM image and (b) TEM image of CoFe- MOF. (c) SEM image and (d) TEM image of (Fe)-Co<sub>3</sub>S<sub>4</sub>.

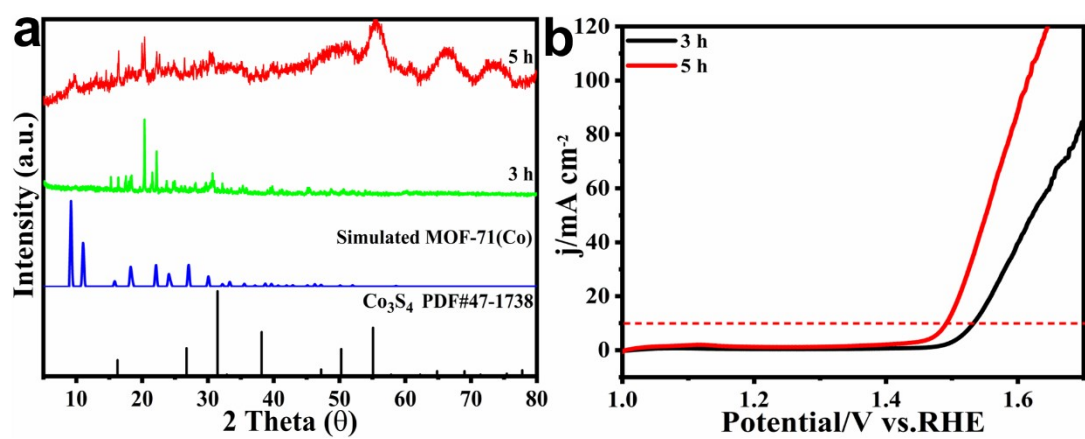

**Fig.S5** (a) XRD patterns of CoFe-MS/MOF synthesized with 3 and 5 h reaction; (b)

OER polarization curves of CoFe-MS/MOF electrodes synthesized with 3 h and 5 h reaction time without iR compensation.

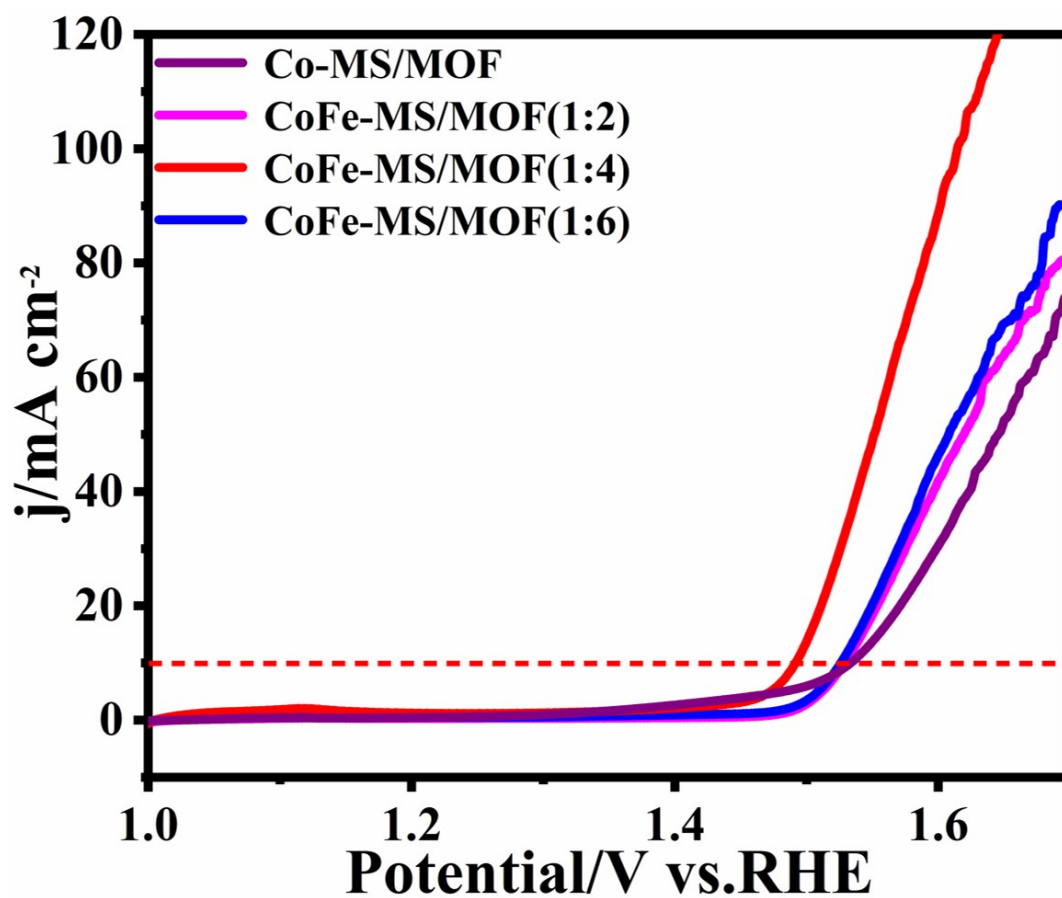

**Fig.S6** OER polarization curves of a batch of CoFe-MS/MOF electrodes synthesized with different Fe/Co dosage ratios without iR compensation.



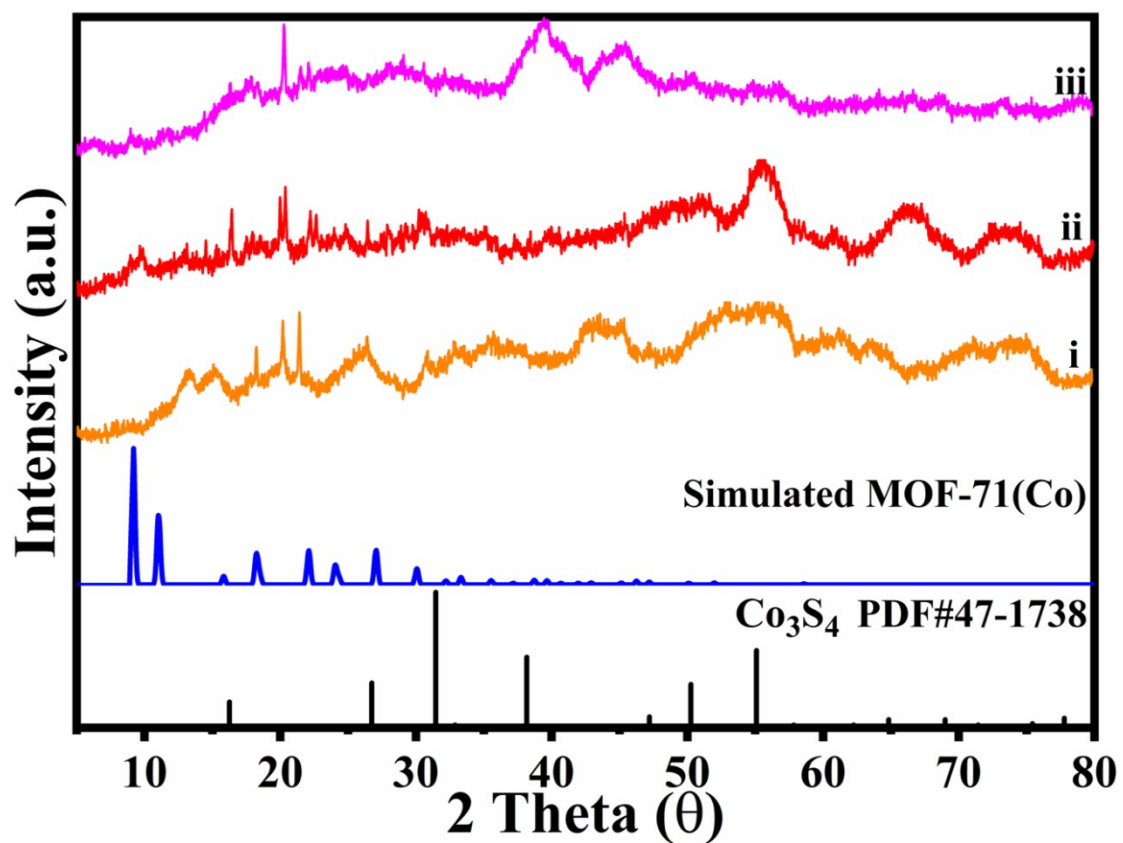

**Fig.S7** XRD patterns of CoFe-MS/MOF samples synthesized with different Fe/Co dosage ratio of (i) 1:2, (ii) 1:4, (iii) 1:6.

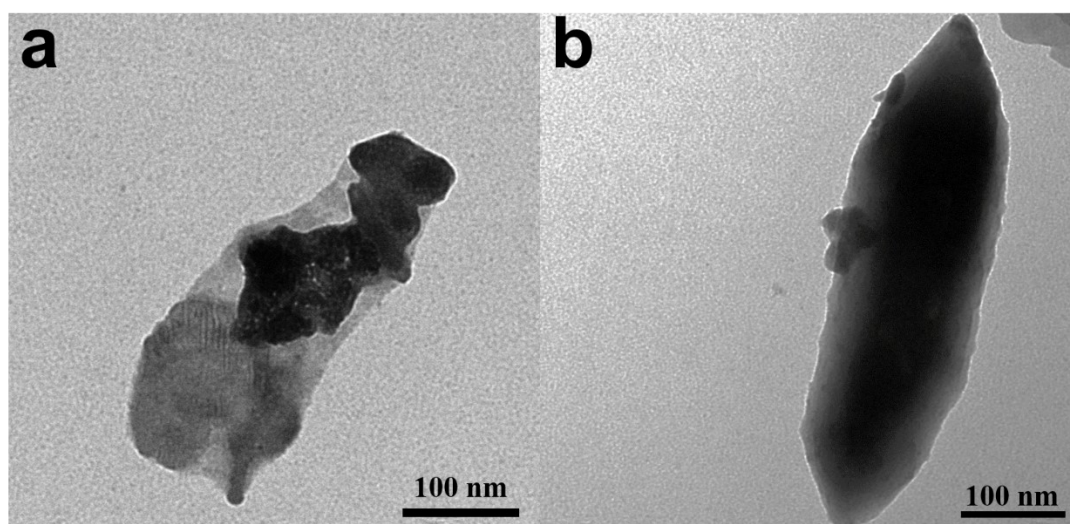

**Fig.S8** TEM images of CoFe-MS/MOF synthesized with Fe/Co dosage ratio of (a) 1:2 and (b) 1:6.



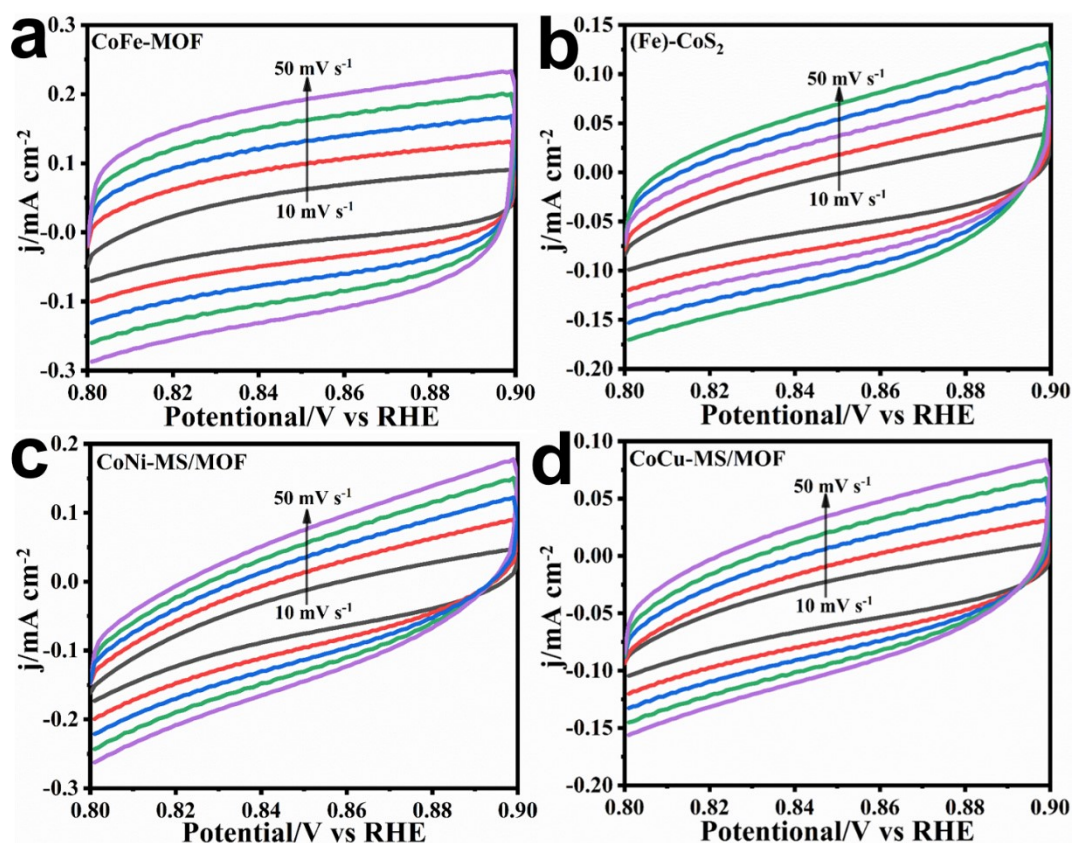

**Fig.S9** CV curves of (a) CoFe-MOF, (b) (Fe)-Co<sub>3</sub>S<sub>4</sub>, (c) CoNi-MS/MOF, and (d) CoCu-MS/MOF with scan rates ranging from 10 to 50 mV s<sup>-1</sup>. By plotting the capacitive currents ( $\Delta J$ ,  $(J_a - J_c)/2$ ) against the scanning rate and following with a linear fit, the  $C_{dl}$  was estimated as the slope.

**Table S1** The transfer resistances obtained from Nyquist plots in 1.0 M KOH solution.

| samples  | CoFe-MS/MOF | CoFe-MOF | (Fe)-Co <sub>3</sub> S <sub>4</sub> | CoNi-MS/MOF | CoCu-MS/MOF |
|----------|-------------|----------|-------------------------------------|-------------|-------------|
| $R_s$    | 5.85        | 6.16     | 6.21                                | 5.21        | 6.37        |
| $R_{ct}$ | 9.50        | 51.8     | 10.10                               | 72.92       | 14.60       |

**Table S2** Comparison of the electrocatalytic OER performance of the as-prepared

catalysts at 10 mA cm<sup>-2</sup> in 1.0 M KOH.

| catalysts                           | Overpotential<br>(mV) | Tafel slope (mV<br>dec <sup>-1</sup> ) | C <sub>dl</sub> (mF cm <sup>-2</sup> ) |
|-------------------------------------|-----------------------|----------------------------------------|----------------------------------------|
| CoFe-MS/MOF                         | 261                   | 60.3                                   | 7.71                                   |
| CoFe-MOF                            | 312                   | 73.6                                   | 2.94                                   |
| (Fe)-Co <sub>3</sub> S <sub>4</sub> | 305                   | 67.1                                   | 1.64                                   |
| CoNi-MS/MOF                         | 304                   | 111.8                                  | 1.94                                   |
| CoCu-MS/MOF                         | 298                   | 130.2                                  | 1.22                                   |
